1 Multicenter Randomized Controlled Trial of Exercise in Aortic Dissection Survivors: Rationale,  
2 Design, and Initial Hemodynamic Data

3 Yasmin A. Toy<sup>1</sup>, Kayla N. House<sup>1</sup>, Leslie M. Boyer<sup>2</sup>, Jennifer L. McNamara<sup>3</sup>, Marion A. Hofmann-  
4 Bowman<sup>3</sup>, Kim A. Eagle<sup>3</sup>, Michelle S. Lim<sup>2</sup>, Alan C. Braverman<sup>2</sup>, Siddharth K. Prakash<sup>1</sup>  
5

6 <sup>1</sup>McGovern Medical School, University of Texas Health Science Center at Houston, Houston, TX, USA.

7 <sup>2</sup>Washington University School of Medicine, St. Louis, MO, USA.

8 <sup>3</sup>University of Michigan Medical School, Ann Arbor, MI, USA.

9  
10 **Correspondence to:**

11 Siddharth K. Prakash, M.D.,

12 Ph.D. McGovern Medical

13 School

14 University of Texas Health Science Center at

15 Houston 6431 Fannin Street, MSB 6.116

16 Houston, Texas 77030, USA

17 Siddharth.K.Prakash@uth.tmc.edu

18 ORCID: 0000-0001-6341-9624

## 19 Abstract

20 There are currently no evidence-based guidelines for exercise after thoracic aortic dissection (TAD),  
21 leading to highly variable recommendations that frequently lead patients to restrict their physical  
22 activities. This multicenter randomized controlled trial was intended to evaluate the safety and efficacy  
23 of a moderate intensity guided exercise program for TAD survivors. Participants were eligible for the  
24 trial if they had a Type A or Type B dissection at least 90 days before enrollment and could attend two  
25 in-person study visits. The guided exercise circuit consisted of six aerobic, isotonic, or isometric  
26 exercises that participants continued at home with virtual follow up sessions. The primary endpoint is  
27 the change in the composite anxiety and depression PROMIS-29 T-score at 12 months. Secondary  
28 endpoints include changes in grip strength, weight, 24-hr ambulatory blood pressure, and arterial  
29 biomechanical properties measured by central arterial waveform analysis. Preliminary analysis of the  
30 first 81 enrolled participants demonstrated that the guided exercise circuit was completed safely and  
31 was not associated with severe exertional hypertension, injury, or adverse cardiovascular events. At  
32 enrollment, most participants had adverse central waveform or ABPM characteristics that are  
33 associated with increased cardiovascular mortality, such as increased arterial stiffness, nocturnal  
34 hypertension, elevated pulse pressure, or blunted nocturnal dipping. Follow up of enrolled participants  
35 with longitudinal hemodynamic data to evaluate the impact of the exercise program will conclude in  
36 October 2024.

37  
38 **Keywords:** exercise, thoracic aortic dissection, thoracic aortic aneurysm, heritable thoracic aortic  
39 disease, ambulatory blood pressure monitoring, hypertension

## INTRODUCTION

Thoracic aortic dissection (TAD) is a life-threatening medical emergency caused by an intimal tear in the thoracic aortic wall (1). Although advances in the surgical intervention, prophylaxis, and early recognition of TAD have improved long-term survival, many individuals with TAD face disabling, lifelong obstacles related to anxiety about sudden risk of death, re-dissection, aortic rupture, and other chronic complications (2, 3).

Observational studies have documented decreased quality of life in TAD survivors related to changes in daily activity levels and frequent anxiety or depression (3, 4). Case reports about acute aortic dissections that occurred during high intensity exercises such as weightlifting have provoked uncertainty about the safety of exercises (5-7). Weightlifting may induce extreme elevations in blood pressure due to potent pressor and Valsalva responses (8). Anxiety about dissection risk may lead TAD survivors to minimize physical activities, leading to additional deterioration of overall cardiovascular health and mental well-being (3). There is an urgent need clarify the safety and benefits of exercise (9). TAD survivors may also benefit from accessible, personalized interventions that address mental health issues (1).

Physical activities can provide synergistic benefits in combination with antihypertensive medications, reducing morbidity and mortality across a wide spectrum of cardiovascular diseases. Regular aerobic or isometric exercise is associated with a dose-dependent decrease in blood pressure, major cardiovascular outcomes, and mortality (10). On a weekly basis, at least 150 minutes of moderate aerobic exercise and 20 minutes of isometric exercise can reduce systolic blood pressure (11). Moderate aerobic activity decreased aortic medial degeneration and reduced aortic dilation in a Marfan syndrome mouse model (6). Abdominal aortic aneurysm expansion rates decreased in patients who engaged in moderate intensity exercise, especially when coupled with improved control of systolic hypertension (12). Cardiac rehabilitation proved to be safe and effective in post-surgical TAD patients, who demonstrated increased aerobic capacity and quality of life (12-14). However, only one quarter of eligible patients in the United States have access to cardiac rehabilitation programs due to social and economic barriers, depriving many patients of the proven benefits related to early guided exercise after surgery or dissection (15). Therefore, exercises that can be performed at home with inexpensive and portable equipment are needed to improve access to the benefits of cardiac rehabilitation.

Regular exercise may uniquely benefit TAD survivors by improving mental health, quality of life, and

74 functional capacity (3). The overall goal of this study is to determine if a guided exercise program  
75 consisting of static and dynamic maneuvers that can be performed at home can decrease anxiety and  
76 increase confidence to engage in physical activities while lowering systolic blood pressure, arterial  
77 stiffness, and other cardiometabolic health measures (11). We demonstrate how this reproducible  
78 protocol can be used to improve the mental and physical well-being of TAD patients.

## 31 **METHODS**

### 33 **Inclusion Criteria and Enrollment**

35 The study protocol was reviewed and approved by the Committee for the Protection of Human  
36 Subjects at the University of Texas Health Science Center at Houston (UTHealth Houston),  
37 University of Michigan, and Washington University School of Medicine. This study was designed to  
38 proceed for 18 months: an anticipated 6 months to complete enrollment and 12 months of follow up  
39 for each participant (**Figure 1**). Aortopathy clinics at UTHealth Houston, Washington University in  
40 St. Louis, and the University of Michigan will recruit a total 126 patients (42 at each site), male and  
41 female, through clinician referral, medical records, databases, and social media campaigns. Patients  
42 who survived a thoracic aortic dissection (Type A or B) at least three months prior to study  
43 enrollment were eligible for inclusion. All potential participants were required to complete the 2009  
44 Behavioral Risk Factor Surveillance Survey (BRFSS) about weekly time engaged in moderate and  
45 strenuous physical activities (Supplemental Text S1). Patients were excluded if any of the following  
46 apply: routine participation in greater than 150 minutes per week of moderate intensity exercises (as  
47 assessed by the BRFSS); unable to attend at least one exercise training session in person;  
48 uncontrolled hypertension (mean SBP greater than 160 mmHg at rest); symptomatic aortic, coronary,  
49 or vascular disease; unable to complete exercise program due to physical limitations, equipment or  
50 space limitations, or time commitment; do not own a treadmill or stationary cycle or have regular  
51 access to one at a gym. If patients are participating in cardiac rehabilitation, enrollment will be  
52 delayed until after discharge from the rehabilitation program.

54 After confirmation of eligibility and consent, all participants completed a demographic survey (age,  
55 sex, race, ethnicity), and the PROMIS-29 v2.0 profile questionnaire (Patient-Reported Outcomes  
56 Measurement Information System), which is validated to assess seven health domains (physical  
57 function, fatigue, pain, depressive symptoms, anxiety, ability to participate in social roles and

activities, and sleep disturbance) (Supplemental Text S2). At enrollment, all participants were fitted with ambulatory blood pressure monitors to wear for 24 hours (ABPM, OnTrak, Space Labs, Inc.) with the cuff on the non-dominant arm. We performed arterial pressure waveform and pulse wave velocity analysis (Sphygmocor, AtCor Medical, Inc.) and recorded one set of orthostatic vital signs (sitting x 3, supine, standing). We also obtained consent to extract additional outcome data from health records. Participants were randomly assigned in a 1:1 ratio to receive the guided exercise program or usual care. Participants in both study arms received all usual clinically indicated care, including diagnostic tests and medications. Recommendations for tests or interventions did not change based on the assigned study arm. At the concluding study visit 12 months after enrollment, all study participants will repeat blood pressure measurements and completed the same BRFSS activity and PROMIS-29 v2.0 questionnaires as at enrollment.

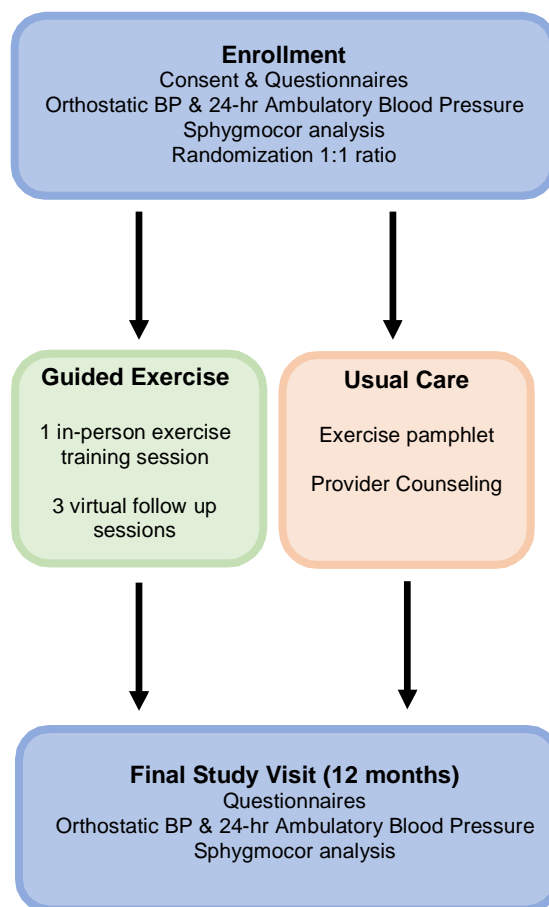

**Figure 1.** Clinical trial design and workflow for guided exercise and usual care groups. Guided exercise participants returned surveys about their routine activities and/or exercise diaries at each study visit.

## Guided Exercise

At enrollment, participants who were randomized to the guided exercise arm completed a supervised exercise protocol that included two circuits of six moderate intensity exercises: bicep curls, wall sits,

35 hand grips, leg raises, stationary cycling and treadmill. Bicep curls were performed with the  
36 dominant hand using 5-, 8-, or 10-pound weights. Wall sits were maintained with a ninety-degree  
37 angle between the back and lower legs. Hand grip resistance level was calculated as 40% of maximal  
38 exertion using the dominant hand. Leg raises were performed in a supine position with both heels  
39 elevated six inches above ground level. Stationary cycling was performed at a target of 100 Watts.  
40 The treadmill was performed once at 3 mph at a 14% grade incline. Cardiac rehabilitation facility  
41 staff and trained study personnel supervised all exercises. Participants maintained exercises at  
42 moderate intensity (50-80% of age-adjusted maximum heart rate) long enough to acquire one  
43 brachial cuff reading (1-2 minutes). Blood pressure measurements during exercise were manually  
44 triggered using the ABPMs and supervisors ensured that the measurement arm was immobilized  
45 while the cuff inflated as recommended in the AHA scientific statement on blood pressure  
46 measurement (16). All exercises were initiated for 15 seconds prior to triggering the ABPM and  
47 maintained until the readings were completed. Post-exercise blood pressure measurements were taken  
48 following each exercise. Exertional hypertension was defined as any systolic blood pressure >180  
49 mmHg or diastolic blood pressure > 100 mmHg on more than 1 exercise. Exercises were promptly  
50 terminated if any of the following occurred: persistent systolic pressure > 160 mmHg persisting after  
51 3 minutes of recovery, any single systolic pressure > 210 mmHg, or any single diastolic blood  
52 pressure > 120 mmHg; chest pain, dyspnea, or significant fatigue; or a request to stop. Perceived  
53 exertion during each exercise was measured using the Borg CR-10 scale, with a score of one  
54 representing minimal exertion and a score of ten indicating maximal exertion (17). Participants  
55 received individualized instruction about how to implement the exercise program at home, with the  
56 weekly target of 5 days or at least 150 total minutes of moderate-intensity exercise. They were also  
57 counseled to record their activities in a monthly exercise diary and share fitness data recorded by  
58 home blood pressure cuffs or wearable devices.

59  
60 After enrollment, the study teams followed up with participants via video check-ins and surveys. All  
61 participants completed BFRSS surveys about the intensity and frequency of their activities at 1, 3, and  
62 9 months, and at the conclusion of the study. In the first month after enrollment, the study teams  
63 conducted one video check-in with each participant to assess any changes in health status, obtain  
64 information about clinic visits, track exercise progress, reinforce teaching about the exercise circuit,  
65 and answer questions about exercise. During the check-in, the study team also observed and corrected  
66 participants as they performed one exercise. Shorter video visits without exercise demonstrations were  
67 repeated at 3 and 9 months after enrollment, in which participants were encouraged to share their  
68 experiences with the exercise protocol and to troubleshoot potential obstacles to exercise. Participants  
69 also transmitted home blood pressure or fitness data to UHealth if they were available. The study

70 teams promoted the target of more than 150 minutes of moderate exercises per week at each  
71 interaction.

## 73 Usual Care

74  
75 Participants who were randomized to usual care completed 24-hour ABPM but did not receive any  
76 teaching regarding exercise and did not participate in any in-person or virtual exercise sessions.  
77 Instead, they attended routine clinic visits and received standardized counseling about exercise,  
78 including a pamphlet with guidelines about living with aortic disease. Participants were not contacted  
79 by the study team after the initial enrollment visit.

## 31 Data Analysis

32  
33 The primary outcome is a clinically significant change in the PROMIS-29 T score or the PROMIS  
34 mental health summary score, a subset of PROMIS questions that primarily assess emotional distress  
35 (anxiety and depressive symptoms). The general population mean of PROMIS T scores is standardized  
36 at 50 points with a standard deviation of 10 points. The minimum clinically important difference (CID)  
37 is 5 points. To detect a change in 5 T score points with  $\beta=0.80$  and  $\alpha=0.05$ , target sample size is  
38 63 patients per study arm (126 total).

39  
40 ABPM outcomes included mean 24-hour, daytime, and nocturnal blood pressures. Pulse pressure,  
41 nocturnal dipping status, blood pressure variability, AASI, and peak systolic pressure were also  
42 included in the analysis because they have been identified as independent predictors of cardiovascular  
43 mortality (18, 19). Study thresholds were derived from published data on ABPM norms: mean 24-hour  
44 pressure  $> 125/75$  mmHg, mean daytime pressure  $> 130/80$  mmHg, mean nighttime pressure  $> 110/65$   
45 mmHg, ambulatory arterial stiffness index (AASI)  $\geq 0.70$ , nocturnal dipping  $< 10\%$ , peak daytime  
46 systolic pressure  $> 180$  mmHg, 24-hour pulse pressure  $> 53$  mmHg, and increased blood pressure  
47 variability, defined as a coefficient of variation  $> 11.1$ . Postural orthostasis was defined as a  $> 20$  mm  
48 Hg decrease in systolic blood pressure and/or a  $> 10$  mm Hg decrease in diastolic blood pressure when  
49 sitting or standing from a supine position. ABP data was analyzed using Sentinel software (v11, Space  
50 Labs, Inc., Snoqualmie, WA). Multiple comparisons were assessed using one-way ANOVA with the  
51 Tukey method.

## 53 RESULTS

## Study cohort

A total of 445 individuals were screened and 250 were found to be eligible for the study. The major reasons why individuals were excluded were: unable to attend in-person study visits (55), exercise equipment inaccessibility (49), unable physically to exercise (42). To date, a total of 81 trial participants were enrolled with complete study data (**Table 1**). Participants who had Type A dissections (n=51) received TEVAR (n = 2), had open repairs (n = 44), or had no interventions (n = 5). Participants who had Type B dissections (n=25) received TEVAR (n = 10), had open repairs (n = 5), or had no interventions (n = 10). Participants who had more than one dissection underwent only open repairs (n = 5).

**Table 1. Demographic Characteristics**

| Variable                               | All Participants<br>(n = 81) | Guided Exercise<br>(n = 38) | Usual Care<br>(n = 43) |
|----------------------------------------|------------------------------|-----------------------------|------------------------|
| <b>Age (y)</b>                         | 57 (17)                      | 56 (17)                     | 57 (19)                |
| <b>Sex</b>                             |                              |                             |                        |
| Female                                 | 22 (27)                      | 11 (29)                     | 11 (26)                |
| <b>Ethnicity</b>                       |                              |                             |                        |
| Hispanic or Latino                     | 2 (2)                        | 1 (3)                       | 1 (2)                  |
| <b>Race</b>                            |                              |                             |                        |
| American Indian/Alaska Native          | 2 (3)                        | 0 (0)                       | 2 (5)                  |
| Asian                                  | 5 (6)                        | 2 (5)                       | 3 (7)                  |
| Native Hawaiian/other Pacific Islander | 1 (1)                        | 0 (0)                       | 1 (2)                  |
| Black or African American              | 9 (11)                       | 4 (11)                      | 5 (12)                 |
| White                                  | 61 (75)                      | 32 (84)                     | 29 (67)                |
| <b>Antihypertensive Medications</b>    | 2 (1)                        | 3 (1)                       | 2 (1)                  |
| Beta blocker                           | 75 (93)                      | 37 (97)                     | 38 (88)                |
| ACEi/ARB                               | 48 (59)                      | 25 (66)                     | 23 (53)                |
| Diuretic                               | 23 (28)                      | 13 (34)                     | 10 (23)                |
| Calcium channel blocker                | 33 (40)                      | 12 (32)                     | 21 (48)                |
| <b>Dissection Data</b>                 |                              |                             |                        |
| Time since dissection (y)              | 3.5 (3)                      | 4 (3)                       | 3.1 (2)                |
| Type A                                 | 51 (63)                      | 25 (66)                     | 26 (60)                |
| Type B                                 | 25 (31)                      | 10 (26)                     | 15 (35)                |
| Multiple dissections                   | 5 (6)                        | 3 (8)                       | 2 (5)                  |

Values are mean (interquartile range), n (%). ACEi: angiotensin-converting enzyme inhibitor. ARB: angiotensin II receptor blockers.

## PROMIS Questionnaire

Evaluation of seven PROMIS domains found that mean T scores for anxiety ( $51 \pm 9$ ), pain ( $51 \pm 7$ ), and impairment of participation in social activities ( $54 \pm 8$ ) were increased. Scores for depression, fatigue, and sleep disturbance were within normal limits. There were no significant differences between PROMIS scores for participants with and without exertional hypertension, or between guided exercise and control groups.



## Grip Strength

At baseline, the mean maximum grip strength was 64 lbs (IQR 12.9). At the first follow up visit, grip strength increased by a mean of 7.8 lb (IQR 6.9).

## Orthostatic and Ambulatory Blood Pressure

At baseline, seven participants (9%) exhibited postural orthostasis. The most prevalent adverse ABPM characteristics were nocturnal hypertension (83%), blunted nocturnal dipping (40%), and elevated mean 24-hour pulse pressure (40%). Participants who developed significant exertional hypertension had higher peak blood pressure values and greater ambulatory blood pressure variability (**Table 2**). There was no association between postural orthostasis and exertional hypertension.

**Table 2. ABPM Characteristics by Exertional Hypertension**

| Variable                | Total (n=71) | Exertional Hypertension (n=13) | No Exertional Hypertension (n=24) | <i>P</i> |
|-------------------------|--------------|--------------------------------|-----------------------------------|----------|
| Mean SBP                | 119 (16)     | 122 (16)                       | 114 (13)                          | 0.13     |
| Mean DBP                | 67 (12)      | 70 (11)                        | 64 (6)                            | 0.06     |
| Day SBP                 | 123 (18)     | 127 (14)                       | 119 (16)                          | 0.3      |
| Day DBP                 | 70 (12)      | 74 (9)                         | 67 (5)                            | 0.05*    |
| Night SBP               | 111 (16)     | 111 (19)                       | 103 (17)                          | 0.12     |
| Night DBP               | 61 (14)      | 62 (11)                        | 58 (14)                           | 0.22     |
| Peak daytime SBP        | 157 (28)     | 178 (34)                       | 154 (22)                          | 0.01*    |
| Pulse Pressure          | 50 (12)      | 46 (10)                        | 48 (17)                           | 0.76     |
| Daytime SBP COV         | 11 (4)       | 14 (4)                         | 11 (4)                            | 0.03*    |
| Morning Surge Index (%) | 16 (18)      | 18 (28)                        | 18 (17)                           | 0.78     |
| Nocturnal Dipping (%)   | 12 (12)      | 17 (10)                        | 14 (9)                            | 0.10     |
| AASI                    | 0.53 (0.16)  | 0.48 (0.08)                    | 0.52 (0.16)                       | 0.51     |

Values are mean (interquartile range). SBP: systolic blood pressure; DBP: diastolic blood pressure; PP: pulse pressure; AASI: ambulatory arterial stiffness index; Exertional hypertension: SBP > 180 mmHg or DBP > 100 mmHg in >1 exercise; COV: coefficient of variation; \*: ANOVA  $P < 0.05$ .

## Safety of Exercise Protocol

All participants completed the study protocol. One in-person exercise session was temporarily delayed after a participant developed severe exertional hypertension (SBP >210), but they were able to complete the protocol after medication adjustment. Exercises that caused SBP to exceed 180 mmHg were: bicep curls (3/37, 8%), wall sits (7/35, 20%), hand grips (1/37, 3%), leg raise (1/37, 3%), stationary bicycling (4/32, 13%), and treadmill (3/36, 8%). Exercises that caused DBP to exceed 100 mmHg were: bicep curls (5/37, 14%), wall sits (11/35, 31%), hand grips (7/37, 19%), leg raise (6/37, 16%), stationary bicycling (1/32, 3%), and treadmill (3/36, 8%).

## Participant Feedback

More than half of respondents (n=23) agreed that participating in the clinical trial improved their outlook on exercise (see Supplemental Text S3 for survey details). Participants expressed increased confidence to engage in physical activities and optimism about participating in exercise after attending an in-person clinical trial visit.

## Technical Issues

Mean individual exercise completion rates from highest to lowest were bicep curls (100%), hand grip (100%), leg raise (100%), treadmill (97%), wall sit (95%), and cycle (87%). The rates for exercises with two readings per participant from highest to lowest were hand grip (92%), leg raise (92%), treadmill (87%), wall sit (84%), bicep curls (82%), and cycle (76%). The most frequent ABPM errors corresponded to excessive arm movement or vibration (Supplemental Table S1). Bracing the measurement arm successfully suppressed most of these errors [16]. We addressed the other major sources of error by changing ABPM cuff size or refitting cuffs according to manufacturer guidelines. To limit overexertion, we attempted ABPM blood pressure readings a maximum number of two times before switching to manual auscultation.

## DISCUSSION

Anxiety and uncertainty about exercise may negatively impact the cardiovascular and mental health of TAD survivors by leading them to restrict their activities. In contrast to case reports that inform current guideline recommendations, this pilot study is the first randomized controlled trial of exercise in TAD survivors. The unique objectives of this study are to assess the effects of an at-home exercise program on hemodynamic and mental health outcomes. The primary outcome is a clinically significant change in the PROMIS- 29 summary T-score or mental health summary score. Secondary outcomes include the change in the burden of ambulatory hypertension and nocturnal dipping as assessed by ambulatory blood pressure monitoring. The guided exercise program proved to be safe for trial participants, and we found that grip strength, a significant predictor of cardiovascular death, increased by 30% in the first three months of participation (20, 21). We also observed adverse ABPM characteristics in many participants that are associated with increased cardiovascular mortality, such as nocturnal hypertension, blunted nocturnal dipping, or elevated pulse pressure. Ambulatory peak blood pressure and blood pressure variability predicted significant exertional hypertension. These observations highlight the high cardiovascular risk of the trial cohort. While self-reported anxiety was

increased in trial participants, there was no correlation between initial PROMIS anxiety T-scores and ambulatory or exertional hypertension.

As the study progressed, we made several adjustments to home exercise instructions and the virtual visit protocol to account for the frailty and decreased physical strength of many TAD participants. The exercise instructions were altered so that participants were able to maintain moderate intensity effort without physical strain. Participants were instructed to scale up individual exercises incrementally, by increasing repetitions in 15 second increments or by two repetitions per week. When starting home exercises, we allowed participants to decrease the initial speed and incline settings of the treadmill, the angle of the wall sit, and the target rate on the stationary bicycle. The virtual visit protocol was amended to collect additional information about contacts with healthcare providers. We also provided personalized counseling to individuals who developed exertional hypertension during the in-person exercise training sessions to modify the intensity of specific exercises and to minimize Valsalva maneuvers during isometric exercises. New participants in the guided exercise study arm received the updated exercise instructions at the initial enrollment visit. Previously enrolled participants received updated instructions and teaching at virtual follow up visits.

The principal limitations to study recruitment were the requirements for participants to have access to exercise equipment at home and for in-person study visits. Technological barriers did limit timely virtual follow up visits with some participants. We plan to address these obstacles in a larger and longer trial that will be adequately powered to determine if guided exercise can reduce aortic events and prevent deaths due to TAD. In such a trial, we will collect longitudinal data on aortic enlargement, arterial stiffness, cardiac function, and serial changes in blood pressure responses to exercise over time. To promote accessibility, we plan to mail portable exercise equipment directly to participants. In the short term, we plan to adapt this protocol to create personalized exercise prescriptions for patients, and in the long-term we hope that these studies may eventually be used to develop evidence-based exercise guidelines.

## **DECLARATIONS**

### **Acknowledgements**

We are profoundly grateful to Bansari Rajani, Gabrielle Sutton, Jatin Khanna, Tara Johnson, Sue Streeter, Cardiac and Pulmonary Rehabilitation Center staff at Memorial Hermann – Texas Medical Center Hospital, and to all study participants for their time and effort. Dr. Braverman’s research is sponsored by the Pam and Ron Rubin Fund at Washington University School of Medicine and the

22 Neidorff Aortopathy and Master Clinician in Cardiology Fellowship Program at Washington  
23 University School of Medicine. We would like to thank the staff of the cardiac rehabilitation program  
24 at Washington University School of Medicine, Barnes-Jewish Heart & Vascular Center, and the staff  
25 of the cardiac rehabilitation program at the Frankel Cardiovascular Center at University of Michigan.

### 27 **Authors' contributions**

28 Toy Y: Data curation, Writing - Original draft preparation; House K: Supervision, Project  
29 administration, Writing - Reviewing and Editing; Boyer L: Supervision, Project administration;  
30 McNamara J: Supervision, Project administration; Hofman-Bowman M: Conceptualization,  
31 Methodology, Writing - Reviewing and Editing, Project administration; Eagle K: Conceptualization,  
32 Methodology, Writing - Reviewing and Editing, Project administration; Braverman A:  
33 Conceptualization, Methodology, Writing - Reviewing and Editing, Project administration; Prakash S:  
34 Conceptualization, Methodology, Writing - Reviewing and Editing, Project administration.

### 36 **Availability of data and materials**

37 Data will be published as supplementary information.

### 39 **Financial support and sponsorship**

40 This work was supported in part by a grant from the John Ritter Foundation for Aortic Health and a  
41 gift from Carmen David.

### 43 **Conflicts of interest**

44 All authors declared that there are no conflicts of interest.

### 46 **Ethical approval and consent to participate**

47  
48 The study protocol was reviewed and approved by the Committee for the Protection of Human  
49 Subjects at the University of Texas Health Science Center at Houston (HSC-MS-22-0936). All  
50 subjects signed a written informed consent document prior to enrollment.

### 52 **Consent for publication**

53 Not applicable.

### 55 **REFERENCES**

- 56 1. Meinschmidt G, Berdajs D, Moser-Starck R, Frick A, Gross S, Schurr U, et al. Perceived Need for Psychosocial  
57 Support After Aortic Dissection: Cross-Sectional Survey. *J Particip Med*. 2020;12(3):e15447.

2. Ghadieh AS, Saab B. Evidence for exercise training in the management of hypertension in adults. *Can Fam Physician*. 2015;61(3):233-9.
3. Chaddha A, Eagle KA, Braverman AC, Kline-Rogers E, Hirsch AT, Brook R, et al. Exercise and Physical Activity for the Post-Aortic Dissection Patient: The Clinician's Conundrum. *Clin Cardiol*. 2015;38(11):647-51.
4. Chaddha A, Kline-Rogers E, Braverman AC, Erickson SR, Jackson EA, Franklin BA, et al. Survivors of Aortic Dissection: Activity, Mental Health, and Sexual Function. *Clin Cardiol*. 2015;38(11):652-9.
5. Li J, Boyd A, Huang M, Berookhim J, Prakash SK. Safety of exercise for adults with thoracic aortic aneurysms and dissections. *Front Sports Act Living*. 2022;4:888534.
6. Gibson C, Nielsen C, Alex R, Cooper K, Farney M, Gaufin D, et al. Mild aerobic exercise blocks elastin fiber fragmentation and aortic dilatation in a mouse model of Marfan syndrome associated aortic aneurysm. *J Appl Physiol* (1985). 2017;123(1):147-60.
7. Milewicz DM, Prakash SK, Ramirez F. Therapeutics Targeting Drivers of Thoracic Aortic Aneurysms and Acute Aortic Dissections: Insights from Predisposing Genes and Mouse Models. *Annu Rev Med*. 2017;68:51-67.
8. MacDougall JD, Tuxen D, Sale DG, Moroz JR, Sutton JR. Arterial blood pressure response to heavy resistance exercise. *J Appl Physiol* (1985). 1985;58(3):785-90.
9. Robicsek F, Thubrikar MJ. Hemodynamic considerations regarding the mechanism and prevention of aortic dissection. *Ann Thorac Surg*. 1994;58(4):1247-53.
10. Hamer M, Bauman A, Bell JA, Stamatakis E. Examining associations between physical activity and cardiovascular mortality using negative control outcomes. *Int J Epidemiol*. 2019;48(4):1161-6.
11. Chaddha A, Kline-Rogers E, Woznicki EM, Brook R, Housholder-Hughes S, Braverman AC, et al. Cardiology patient page. Activity recommendations for post-aortic dissection patients. *Circulation*. 2014;130(16):e140-2.
12. Nakayama A, Morita H, Nagayama M, Hoshina K, Uemura Y, Tomoike H, Komuro I. Cardiac Rehabilitation Protects Against the Expansion of Abdominal Aortic Aneurysm. *J Am Heart Assoc*. 2018;7(5).
13. Corone S, Iliou MC, Pierre B, Feige JM, Odjinkem D, Farrokhi T, et al. French registry of cases of type I acute aortic dissection admitted to a cardiac rehabilitation center after surgery. *Eur J Cardiovasc Prev Rehabil*. 2009;16(1):91-5.
14. Hornsby WE, Norton EL, Fink S, Saberi S, Wu X, McGowan CL, et al. Cardiopulmonary Exercise Testing Following Open Repair for a Proximal Thoracic Aortic Aneurysm or Dissection. *J Cardiopulm Rehabil Prev*. 2020;40(2):108-15.
15. Ritchey MD, Maresh S, McNeely J, Shaffer T, Jackson SL, Keteyian SJ, et al. Tracking Cardiac Rehabilitation Participation and Completion Among Medicare Beneficiaries to Inform the Efforts of a National Initiative. *Circ Cardiovasc Qual Outcomes*. 2020;13(1):e005902.
16. Muntner P, Shimbo D, Carey RM, Charleston JB, Gaillard T, Misra S, et al. Measurement of Blood Pressure in Humans: A Scientific Statement From the American Heart Association. *Hypertension*. 2019;73(5):e35-e66.
17. Borg G. Perceived exertion as an indicator of somatic stress. *Scand J Rehabil Med*. 1970;2(2):92-8.
18. Dolan E, Thijs L, Li Y, Atkins N, McCormack P, McClory S, et al. Ambulatory arterial stiffness index as a predictor of cardiovascular mortality in the Dublin Outcome Study. *Hypertension*. 2006;47(3):365-70.
19. Kario K. Evidence for the surge blood pressure resonance hypothesis as a trigger for cardiovascular disease events. *Hypertens Res*. 2023;46(9):2065-9.
20. Liu W, Leong DP, Hu B, AhTse L, Rangarajan S, Wang Y, et al. The association of grip strength with cardiovascular diseases and all-cause mortality in people with hypertension: Findings from the Prospective Urban Rural Epidemiology China Study. *J Sport Health Sci*. 2021;10(6):629-36.
21. Leong DP, Teo KK, Rangarajan S, Lopez-Jaramillo P, Avezum A, Jr., Orlandini A, et al. Prognostic value of grip strength: findings from the Prospective Urban Rural Epidemiology (PURE) study. *Lancet*. 2015;386(9990):266-73.

58  
59  
50  
51  
52  
53  
54  
55  
56  
57  
58  
59  
70  
71  
72  
73  
74  
75  
76  
77  
78  
79  
30  
31  
32  
33  
34  
35  
36  
37  
38  
39  
40  
41  
42  
43  
44  
45  
46  
47  
48  
49  
50

## Supplementary Material: Multicenter Randomized Controlled Trial of Exercise in Aortic Dissection Survivors: Rationale, Design, and Initial Hemodynamic Data

Supplementary Table 1. Most frequently observed Space Labs ABPM error codes.

| Error Code   | Condition                                                                                                                                        |
|--------------|--------------------------------------------------------------------------------------------------------------------------------------------------|
| EC04         | Occasional EC04 messages reflect excessive patient movement. Frequent EC04 messages indicate an improperly applied cuff or a monitor malfunction |
| EC10, 70, 90 | Excessive movement                                                                                                                               |
| EC11         | Monitor did not pump above mean arterial level                                                                                                   |
| EC40         | Movement during systole                                                                                                                          |
| EC50, 58     | Movement during diastole                                                                                                                         |
| EC52         | Kinked tubing                                                                                                                                    |
| EC62         | Cuff applied too loosely                                                                                                                         |

## BRFSS Questionnaire: Physical Activity

---

When you are at work, which of the following best describes what you do?

If you have more than one job, consider all jobs in your answer.

- Mostly sitting or standing
- Mostly walking
- Mostly heavy labor or physically demanding work
- Don't know / Not sure  
(include all jobs)

---

**We are interested in two types of physical activity: vigorous and moderate. Vigorous activities cause large increases in breathing or heart rate. Moderate activities cause small increases in breathing or heart rate.**

---

Thinking about the moderate activities you do in a usual week, do you do moderate activities for at least 10 minutes at a time, such as brisk walking, bicycling, vacuuming, gardening, or anything else that causes a small increase in breathing or heart rate?

- Yes
- No
- Don't know / Not sure

---

How many days per week do you do these moderate activities for at least 10 minutes at a time? \_\_\_\_\_

---

On days when you do moderate activities for at least 10 minutes at a time, how much total time per day do you spend doing these activities? Answer to the nearest hour. \_\_\_\_\_

---

Now, thinking about the vigorous activities you do in a usual week, do you do vigorous activities for at least 10 minutes at a time, such as running, aerobics, heavy yard work, or anything else that causes large increases in breathing or heart rate?

- Yes
- No
- Don't know / Not sure

---

How many days per week do you do these vigorous activities for at least 10 minutes at a time? \_\_\_\_\_

---

On days when you do vigorous activities for at least 10 minutes at a time, how much total time per day do you spend doing these activities? Answer to the nearest hour. \_\_\_\_\_

---

For BRFSS Survey Questions

Centers for Disease Control and Prevention (CDC). Behavioral Risk Factor Surveillance System Survey Questionnaire.

Atlanta, Georgia: U.S. Department of Health and Human Services, Centers for Disease Control and Prevention, 2009.

<http://www.cdc.gov/brfss/suggestedcitation.htm>

# 1) PROMIS - Physical Function

Please complete the survey below.

Thank you!

## FINAL RESULTS

T-score

\_\_\_\_\_

Standard Error

\_\_\_\_\_

## PFA11

Are you able to do chores such as vacuuming or yard work?

- Without any difficulty
- With a little difficulty
- With some difficulty
- With much difficulty
- Unable to do

## PFA21

Are you able to go up and down stairs at a normal pace?

- Without any difficulty
- With a little difficulty
- With some difficulty
- With much difficulty
- Unable to do

## PFA23

Are you able to go for a walk of at least 15 minutes?

- Without any difficulty
- With a little difficulty
- With some difficulty
- With much difficulty
- Unable to do

## PFA53

Are you able to run errands and shop?

- Without any difficulty
- With a little difficulty
- With some difficulty
- With much difficulty
- Unable to do



## 2) PROMIS - Anxiety

### FINAL RESULTS

T-score

\_\_\_\_\_

Standard Error

\_\_\_\_\_

### EDANX01

In the past 7 days  
I felt fearful

- Never
- Rarely
- Sometimes
- Often
- Always

### EDANX40

In the past 7 days  
I found it hard to focus on anything other than my  
anxiety

- Never
- Rarely
- Sometimes
- Often
- Always

### EDANX41

In the past 7 days  
My worries overwhelmed me

- Never
- Rarely
- Sometimes
- Often
- Always

### EDANX53

In the past 7 days  
I felt uneasy

- Never
- Rarely
- Sometimes
- Often
- Always

Acknowledgment: PROMIS Health Organization and Assessment Center<sup>SM</sup> View full acknowledgment

### 3) PROMIS - Depression

#### FINAL RESULTS

T-score \_\_\_\_\_

Standard Error \_\_\_\_\_

#### EDDEP04

In the past 7 days  
I felt worthless

Never  
 Rarely  
 Sometimes  
 Often  
 Always

#### EDDEP06

In the past 7 days  
I felt helpless

Never  
 Rarely  
 Sometimes  
 Often  
 Always

#### EDDEP29

In the past 7 days  
I felt depressed

Never  
 Rarely  
 Sometimes  
 Often  
 Always

#### EDDEP41

In the past 7 days  
I felt hopeless

Never  
 Rarely  
 Sometimes  
 Often  
 Always

Acknowledgment: PROMIS Health Organization and Assessment Center<sup>SM</sup> View full acknowledgment

## 4) PROMIS - Fatigue

### FINAL RESULTS

T-score

\_\_\_\_\_

Standard Error

\_\_\_\_\_

### HI7

During the past 7 days:  
I feel fatigued

- Not at all
- A little bit
- Somewhat
- Quite a bit
- Very much

### FATEXP40

In the past 7 days  
How fatigued were you on average?

- Not at all
- A little bit
- Somewhat
- Quite a bit
- Very much

### FATEXP41

In the past 7 days  
How run-down did you feel on average?

- Not at all
- A little bit
- Somewhat
- Quite a bit
- Very much

### An3

During the past 7 days:  
I have trouble starting things because I am tired

- Not at all
- A little bit
- Somewhat
- Quite a bit
- Very much

Acknowledgment: PROMIS Health Organization and Assessment Center<sup>SM</sup> View full acknowledgment

## 5) PROMIS - Sleep Disturbance

### FINAL RESULTS

T-score

\_\_\_\_\_

Standard Error

\_\_\_\_\_

### Sleep116

In the past 7 days  
My sleep was refreshing.

- Not at all
- A little bit
- Somewhat
- Quite a bit
- Very much

### Sleep20

In the past 7 days  
I had a problem with my sleep.

- Not at all
- A little bit
- Somewhat
- Quite a bit
- Very much

### Sleep44

In the past 7 days  
I had difficulty falling asleep.

- Not at all
- A little bit
- Somewhat
- Quite a bit
- Very much

### Sleep109

In the past 7 days  
My sleep quality was...

- Very poor
- Poor
- Fair
- Good
- Very good

Acknowledgment: PROMIS Health Organization and Assessment Center<sup>SM</sup> View full acknowledgment

## 6) PROMIS - Ability to Participate Social

### FINAL RESULTS

T-score

\_\_\_\_\_

Standard Error

\_\_\_\_\_

### SRPPER11\_CaPS

I have trouble doing all of my regular leisure activities with others

- Never
- Rarely
- Sometimes
- Usually
- Always

### SRPPER18\_CaPS

I have trouble doing all of the family activities that I want to do

- Never
- Rarely
- Sometimes
- Usually
- Always

### SRPPER23\_CaPS

I have trouble doing all of my usual work (include work at home)

- Never
- Rarely
- Sometimes
- Usually
- Always

### SRPPER46\_CaPS

I have trouble doing all of the activities with friends that I want to do

- Never
- Rarely
- Sometimes
- Usually
- Always

Acknowledgment: PROMIS Health Organization and Assessment Center<sup>SM</sup> View full acknowledgment

## 7) PROMIS - Pain Interference

### FINAL RESULTS

T-score

\_\_\_\_\_

Standard Error

\_\_\_\_\_

### PAININ9

In the past 7 days  
How much did pain interfere with your day to day  
activities?

- Not at all
- A little bit
- Somewhat
- Quite a bit
- Very much

### PAININ22

In the past 7 days  
how much did pain interfere with work around the home?

- Not at all
- A little bit
- Somewhat
- Quite a bit
- Very much

### PAININ31

In the past 7 days  
How much did pain interfere with your ability to  
participate in social activities?

- Not at all
- A little bit
- Somewhat
- Quite a bit
- Very much

### PAININ34

In the past 7 days  
How much did pain interfere with your household  
chores?

- Not at all
- A little bit
- Somewhat
- Quite a bit
- Very much

Acknowledgment: PROMIS Health Organization and Assessment Center<sup>SM</sup> View full acknowledgment

# Evaluation Survey

Please complete the survey below.

Thank you!

**Directions: Please answer each question by using the slider to indicate which choice most accurately describes you. Read each question carefully.**

**Prompt: Before attending an in-person enrollment visit for the clinical trial...**

- 1) How did you generally feel about engaging in moderate physical activity?

Confident                      Neutral                      Uneasy

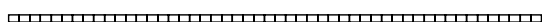

(Place a mark on the scale above)

- 2) How would you rate your confidence to engage in physical activity?

High confidence                      Moderate confidence                      Low confidence

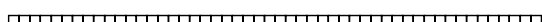

(Place a mark on the scale above)

- 3) How would you rate your outlook on exercise post-dissection?

Excited                      Neutral                      Discouraged

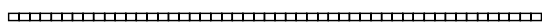

(Place a mark on the scale above)

**Prompt: After attending an in-person study visit for the clinical trial...**

- 4) How do you generally feel about engaging in moderate physical activity?

Confident                      Neutral                      Uneasy

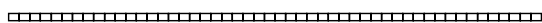

(Place a mark on the scale above)

- 5) How would you rate your confidence to engage in physical activity?

High confidence                      Moderate confidence                      Low confidence

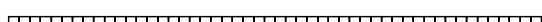

(Place a mark on the scale above)

- 6) How would you rate your outlook on exercise post-dissection?

Excited                      Neutral                      Discouraged

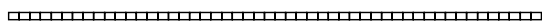

(Place a mark on the scale above)

**Directions: please select the choice that most accurately describes you.**

- 7) Participating in the clinical trial has positively changed my outlook on exercise post-dissection.
- Strongly Disagree
  - Disagree
  - Neither agree nor disagree
  - Agree
  - Strongly Agree

---

8) Participating in the clinical trial has not changed my  Strongly Disagree outlook on exercise-on-ex  
 Neither  
 agree  
 e nor  
 disag  
 ree  
Agree  
e  
Strongly Agree

---

9) Participating in the clinical trial has negatively  Strongly Disagree changed my outlook on e:  
 Neither  
medRxiv preprint doi: <https://doi.org/10.1101/2024.03.08.24303985>; this version posted March 10, 2024. The copyright holder for this preprint  
(which was not certified by peer review) is the author/funder, who has granted medRxiv a license to display the preprint in perpetuity.  
It is made available under a [CC-BY 4.0 International license](https://creativecommons.org/licenses/by/4.0/).  
 agree  
 e nor  
 disag  
 ree  
Agree  
e  
Strongly Agree

---

10) Please use this field to  
provide any feedback about  
your experiences with the  
clinical trial thus far.

---
